# Supplementary material
Source: publisher site journal article supplement (https://www.dovepress.com/article/431375)

**Association between elevated blood eosinophils and chronic kidney disease progression:  
analyses of a large United States electronic health records database**

Danuta Kielar, MD, PhD<sup>1</sup>; Andrew M. Jones, MSc<sup>2</sup>; Xia Wang, PhD<sup>3</sup>; Heide Stirnadel-Farrant, PhD<sup>1</sup>; Rohit K. Katial, MD<sup>4</sup>; Abhinav Bansal, MS<sup>5</sup>; Manu Garg, B. Tech<sup>5</sup>; Chandrakant Sharma, B. Tech<sup>5</sup>; Shubhankar Thakar, MS<sup>5</sup>; Qin Ye, MD, MS<sup>5</sup>

<sup>1</sup> BioPharmaceuticals Medical, AstraZeneca, Cambridge, UK

<sup>2</sup> Late-stage development, Respiratory & Immunology, BioPharmaceuticals R&D, AstraZeneca, Gaithersburg, MD, USA

<sup>3</sup> Data Science & AI, BioPharmaceuticals R&D, AstraZeneca, Gaithersburg, MD, USA

<sup>4</sup> BioPharmaceuticals Medical, AstraZeneca, Gaithersburg, MD, USA

<sup>5</sup> ZS, Philadelphia, PA, USA

**Table S1. Patient eligibility criteria**

| <b>Inclusion criteria</b>                                                                                 | <b>Exclusion criteria</b>                                                                                                                                                                                                                                  |
|-----------------------------------------------------------------------------------------------------------|------------------------------------------------------------------------------------------------------------------------------------------------------------------------------------------------------------------------------------------------------------|
| Adults $\geq 18$ years                                                                                    | Acute kidney injury                                                                                                                                                                                                                                        |
| CKD stages 3-4 identified by 2 confirmatory diagnoses (90-730 days apart)                                 | History of renal transplant or renal replacement therapy                                                                                                                                                                                                   |
| $\geq 2$ blood eosinophil tests during the CKD episode                                                    | Malignancies                                                                                                                                                                                                                                               |
| $\geq 1$ year of continuous enrollment prior to the first confirmatory diagnosis of CKD stage 3 or higher | Myeloproliferative disorders                                                                                                                                                                                                                               |
|                                                                                                           | Recent history, within 6 months of CKD diagnosis, of chronic or active infection or intake of cytotoxic or immunosuppressant medications (not including steroids) as determined from Current Procedural Terminology codes (4 <sup>th</sup> edition, CPT-4) |

# Table S2

## Procedures

| Procedure         | CPT Code                                                                                                                                                                                                                                                |
|-------------------|---------------------------------------------------------------------------------------------------------------------------------------------------------------------------------------------------------------------------------------------------------|
| Kidney transplant | 50300,50320,50323,50325,50327,50328,50329,50340,50360,50365,50380,50547,55.51,55.54,55.61,0TY00Z0,0TY00Z1,0TY10Z0,0TY10Z1                                                                                                                               |
| Heart transplant  | 33940,33944,33945,37.51,02YA0Z0,02YA0Z1                                                                                                                                                                                                                 |
| Lung transplant   | 0BYM0Z0,0BYM0Z1,0BYK0Z0,0BYK0Z1,0BYL0Z0,0BYL0Z1,32850,32851,32852,32853,32854,32855,32856,S2060,S2061,33.50,33.51,33.52,0BYC0Z0,0BYC0Z1,0BYD0Z0,0BYD0Z1,0BYF0Z0,0BYF0Z1,0BYG0Z0,0BYG0Z1,0BYH0Z0,0BYH0Z1,0BYJ0Z0,0BYJ0Z1,0BYL0Z0,0BYL0Z1,0BYM0Z0,0BYM0Z1 |
| Hemodialysis      | 90,935,909,379,093,900,000                                                                                                                                                                                                                              |
| Other dialysis    | 909,459,094,790,989,000,000,000,000                                                                                                                                                                                                                     |
| Blood transfusion | 36430                                                                                                                                                                                                                                                   |

## Diagnosis Codes for Identifying Diseases

| Comorbidity               | Diagnosis Code                                                                                                                                                                                                                                                                                                                                                                                                                                                                                                                                                                                                                                                                                                                                                                                                                                                                                                                                                                                                                                                                                                                                                                                                                                                                                                                                                                                                                                                                                                                                                                                                                                                                                                                                                                                                                                                                                                                                                                                                                                                                                                                                                                                                                                                                                                                                                                                                                                                                                                                                                                                                                                                                                                                                                                                                                                  |
|---------------------------|-------------------------------------------------------------------------------------------------------------------------------------------------------------------------------------------------------------------------------------------------------------------------------------------------------------------------------------------------------------------------------------------------------------------------------------------------------------------------------------------------------------------------------------------------------------------------------------------------------------------------------------------------------------------------------------------------------------------------------------------------------------------------------------------------------------------------------------------------------------------------------------------------------------------------------------------------------------------------------------------------------------------------------------------------------------------------------------------------------------------------------------------------------------------------------------------------------------------------------------------------------------------------------------------------------------------------------------------------------------------------------------------------------------------------------------------------------------------------------------------------------------------------------------------------------------------------------------------------------------------------------------------------------------------------------------------------------------------------------------------------------------------------------------------------------------------------------------------------------------------------------------------------------------------------------------------------------------------------------------------------------------------------------------------------------------------------------------------------------------------------------------------------------------------------------------------------------------------------------------------------------------------------------------------------------------------------------------------------------------------------------------------------------------------------------------------------------------------------------------------------------------------------------------------------------------------------------------------------------------------------------------------------------------------------------------------------------------------------------------------------------------------------------------------------------------------------------------------------|
| Anemia                    | 2820,2821,2822,2823,2824,28240,28241,28242,28243,28244,28245,28246,28247,28249,2825,28260,28261,28262,28263,28264,28268,28269,2827,2828,2829,2830,28310,28311,28319,2832,2839,28401,28409,2841,28411,28412,28419,2842,2848,28481,28489,2849,D6101,D6109,D611,D612,D613,D61810,D61811,D61818,D6182,D6189,D619,D62,D630,D631,D638,D640,D641,D642,D643,D644,D6481,D6489,D649                                                                                                                                                                                                                                                                                                                                                                                                                                                                                                                                                                                                                                                                                                                                                                                                                                                                                                                                                                                                                                                                                                                                                                                                                                                                                                                                                                                                                                                                                                                                                                                                                                                                                                                                                                                                                                                                                                                                                                                                                                                                                                                                                                                                                                                                                                                                                                                                                                                                       |
| Diabetes                  | 25002,E1165,25080,25060,25040,25062,25050,25070,E1140,25042,E118,E1122,25003,E11621,E1142,25090,E1169,E1121,E1129,25082,E1151,25010,25072,E1159,E11319,25092,25013,E1149,E11329,E1065,25052,25063,25051,24980,E11649,E11622,E1139,25081,25071,25022,25020,25012,E1310,E1152,E113299,E113293,25061,24940,E1342,E11628,E11610,E11359,E11351,E113393,E113312,E11331,E108,E1052,E1022,E0865,E08621,25093,25091,25053,25043,25041,25011,24950,24901,E138,E13621,E1351,E1341,E11620,E1143,E1141,E1137X9,E113513,E11349,E1341,E11339,E113313,E113213,E113212,E11311,E1101,E1100,E10649,E10621,E1059,E103313,E103312,E10329,E1029,E1021,E1010,E0965,E0940,E0842,E083392,E0829,25083,24990,24971,24960,E1369,E1365,E13649,E13641,E13638,E13630,E13628,E13622,E13620,E13618,E1359,E1352,E1349,E1344,E1343,E1340,E1339,E1337X1,E1336,E133599,E133593,E133591,E13359,E133531,E133513,E133512,E13351,E133499,E13349,E13341,E133399,E133393,E13339,E13331,E133299,E133293,E13329,E133213,E133211,E13321,E13319,E13311,E1329,E1322,E1321,E1311,E1301,E1300,E11641,E11638,E11630,E11618,E1144,E1137X3,E1137X2,E1137X1,E1136,E113599,E113593,E113592,E113591,E113559,E113553,E113552,E113551,E113543,E113542,E113541,E113533,E113532,E113531,E113523,E113522,E113521,E113519,E113512,E113511,E113499,E113493,E113492,E113491,E113419,E113413,E113412,E113411,E113399,E113392,E113391,E113319,E113311,E113292,E113291,E113219,E113211,E11321,E1111,E1110,E1069,E10641,E10638,E10628,E10622,E10620,E10618,E10610,E1051,E1049,E1044,E1043,E1042,E1041,E1040,E1039,E1037X1,E1036,E103599,E103593,E103592,E103591,E10359,E103559,E103553,E103552,E103542,E103533,E103532,E103531,E103523,E103522,E103521,E103519,E103513,E103512,E103511,E10351,E103499,E103493,E103492,E103491,E103419,E103413,E103412,E103411,E10341,E103399,E103393,E103392,E103391,E10339,E103319,E103311,E10331,E103299,E103293,E103292,E103291,E103219,E103213,E103212,E103211,E10321,E10319,E10311,E1011,E098,E0969,E09649,E09641,E09638,E09628,E09622,E09621,E0959,E0952,E0951,E0949,E0944,E0943,E0942,E0936,E09359,E093293,E09329,E09321,E09319,E09311,E0929,E0922,E0921,E0911,E0910,E0900,E0888,E0869,E08649,E08641,E08638,E08630,E08628,E08622,E08620,E08618,E08610,E0859,E0852,E0851,E0849,E0844,E0843,E0841,E0840,E0839,E0836,E083599,E083593,E083592,E083591,E08359,E083519,E083513,E083512,E083511,E08351,E08349,E083419,E083412,E08341,E08341,E083399,E083393,E083391,E08339,E083319,E083313,E08331,E083299,E083293,E083292,E08329,E083219,E083213,E083211,E08321,E08319,E08311,E0822,E0821,E0811,E0810,E0801,E0800,25073,25033,25032,25031,25030,25023,25021,24991,24981,24970,24961,24951,24941,24931,24930,24921,24920,24911,24910,25000,E119,79029,25001,79021,R7309,R739,E109,79022,R7301,24900,R7303,R7302,E139,E089,R81,V4585,E099,7915,Z9641,Z4681,V6546,V5391,R824,7916,7902 |
| Hypertension              | 4019,I10,4011,40391,40390,I129,4010,I120,40210,40290,I110,40310,40491,I130,I160,I119,40301,I132,40599,40300,I159,40311,40201,I161,40493,I1310,4372,40410,40401,40211,I674,I1311,40591,40501,40492,40490,40413,40411,40402,40291,40200,N262,I169,I158,I152,I151,I150,40519,40511,40509,4049,40412,4041,40403,40400,4039,4031                                                                                                                                                                                                                                                                                                                                                                                                                                                                                                                                                                                                                                                                                                                                                                                                                                                                                                                                                                                                                                                                                                                                                                                                                                                                                                                                                                                                                                                                                                                                                                                                                                                                                                                                                                                                                                                                                                                                                                                                                                                                                                                                                                                                                                                                                                                                                                                                                                                                                                                     |
| Acute kidney injury       | 5845,5846,5847,5848,5849,586,N170,N171,N172,N178,N179                                                                                                                                                                                                                                                                                                                                                                                                                                                                                                                                                                                                                                                                                                                                                                                                                                                                                                                                                                                                                                                                                                                                                                                                                                                                                                                                                                                                                                                                                                                                                                                                                                                                                                                                                                                                                                                                                                                                                                                                                                                                                                                                                                                                                                                                                                                                                                                                                                                                                                                                                                                                                                                                                                                                                                                           |
| Hyperthyroidism           | 24200,24201,24210,24211,24220,24221,24230,24231,24240,24241,24280,24281,24290,24291,E0500,E0501,E0510,E0511,E0520,E0521,E0530,E0531,E0540,E0541,E0580,E0581,E0590,E0591                                                                                                                                                                                                                                                                                                                                                                                                                                                                                                                                                                                                                                                                                                                                                                                                                                                                                                                                                                                                                                                                                                                                                                                                                                                                                                                                                                                                                                                                                                                                                                                                                                                                                                                                                                                                                                                                                                                                                                                                                                                                                                                                                                                                                                                                                                                                                                                                                                                                                                                                                                                                                                                                         |
| Dyslipidemia              | E78.6,E78.1,272.4                                                                                                                                                                                                                                                                                                                                                                                                                                                                                                                                                                                                                                                                                                                                                                                                                                                                                                                                                                                                                                                                                                                                                                                                                                                                                                                                                                                                                                                                                                                                                                                                                                                                                                                                                                                                                                                                                                                                                                                                                                                                                                                                                                                                                                                                                                                                                                                                                                                                                                                                                                                                                                                                                                                                                                                                                               |
| Proteinuria               | D511,7910,R809,R808,R803,R801,R800,O133,O139,O134,O135,O132,O131,N069,N068,N067,N065,N064,N063,N062,N061,N060,O1223,O1222,O1220,O1215,O1214,O1213,O1212,O1211,O1210,R802,5936                                                                                                                                                                                                                                                                                                                                                                                                                                                                                                                                                                                                                                                                                                                                                                                                                                                                                                                                                                                                                                                                                                                                                                                                                                                                                                                                                                                                                                                                                                                                                                                                                                                                                                                                                                                                                                                                                                                                                                                                                                                                                                                                                                                                                                                                                                                                                                                                                                                                                                                                                                                                                                                                   |
| Urinary tract obstruction | 59960, 59969, N139                                                                                                                                                                                                                                                                                                                                                                                                                                                                                                                                                                                                                                                                                                                                                                                                                                                                                                                                                                                                                                                                                                                                                                                                                                                                                                                                                                                                                                                                                                                                                                                                                                                                                                                                                                                                                                                                                                                                                                                                                                                                                                                                                                                                                                                                                                                                                                                                                                                                                                                                                                                                                                                                                                                                                                                                                              |
| Sickle cell disease       | 28260,28262,28261,D571,D5700,28269,28263,28264,28241,D5720,28268,D57819,D57419,D5740,D573,D57219,D5701,2825,28242,D57811,D5780,D57412,D57411,D57211,D5702                                                                                                                                                                                                                                                                                                                                                                                                                                                                                                                                                                                                                                                                                                                                                                                                                                                                                                                                                                                                                                                                                                                                                                                                                                                                                                                                                                                                                                                                                                                                                                                                                                                                                                                                                                                                                                                                                                                                                                                                                                                                                                                                                                                                                                                                                                                                                                                                                                                                                                                                                                                                                                                                                       |
| Polycystic kidney disease | Q613,75312,Q612,Q6119,75314,75313                                                                                                                                                                                                                                                                                                                                                                                                                                                                                                                                                                                                                                                                                                                                                                                                                                                                                                                                                                                                                                                                                                                                                                                                                                                                                                                                                                                                                                                                                                                                                                                                                                                                                                                                                                                                                                                                                                                                                                                                                                                                                                                                                                                                                                                                                                                                                                                                                                                                                                                                                                                                                                                                                                                                                                                                               |
| Goodpasture's syndrome    | 44621,M310                                                                                                                                                                                                                                                                                                                                                                                                                                                                                                                                                                                                                                                                                                                                                                                                                                                                                                                                                                                                                                                                                                                                                                                                                                                                                                                                                                                                                                                                                                                                                                                                                                                                                                                                                                                                                                                                                                                                                                                                                                                                                                                                                                                                                                                                                                                                                                                                                                                                                                                                                                                                                                                                                                                                                                                                                                      |
| Glomerulonephritis        | 58381,5819,5811,N049,5831,5821,N042,5839,58389,5829,5830,5820,58181,5813,5809,58089,N073,N072,N067,N065,N064,N063,N062,N057,N055,N054,N053,N052,N048,N047,N046,N045,N044,N043,N041,N040,N037,N035,N034,N033,N032,N027,N025,N024,N023,N022,N017,N013,N012,N007,N005,N004,N003,N002,5837,5836,5834,5832,58289,58281,5824,5822,58189,5812,5810,58081,5804,5800                                                                                                                                                                                                                                                                                                                                                                                                                                                                                                                                                                                                                                                                                                                                                                                                                                                                                                                                                                                                                                                                                                                                                                                                                                                                                                                                                                                                                                                                                                                                                                                                                                                                                                                                                                                                                                                                                                                                                                                                                                                                                                                                                                                                                                                                                                                                                                                                                                                                                     |
| Obesity                   | 27800,27801,E669,E6601,E6609,E662,27803,E668,E661                                                                                                                                                                                                                                                                                                                                                                                                                                                                                                                                                                                                                                                                                                                                                                                                                                                                                                                                                                                                                                                                                                                                                                                                                                                                                                                                                                                                                                                                                                                                                                                                                                                                                                                                                                                                                                                                                                                                                                                                                                                                                                                                                                                                                                                                                                                                                                                                                                                                                                                                                                                                                                                                                                                                                                                               |
| Dialysis                  | Z992,V4511,V561,V560,Z4901,V562,Z9115,Z4902,V568,V4512,R880,7925                                                                                                                                                                                                                                                                                                                                                                                                                                                                                                                                                                                                                                                                                                                                                                                                                                                                                                                                                                                                                                                                                                                                                                                                                                                                                                                                                                                                                                                                                                                                                                                                                                                                                                                                                                                                                                                                                                                                                                                                                                                                                                                                                                                                                                                                                                                                                                                                                                                                                                                                                                                                                                                                                                                                                                                |
| Asthma                    | 493.0,493.00,493.01,493.02,493.1,493.10,493.11,493.12,493.81,493.82,493.9,493.90,493.91,493.92,445.20,445.21,445.22,445.30,445.31,445.32,445.40,445.41,445.42,445.50,445.51,445.52,445.901,445.902,445.909,445.990,445.991,445.998                                                                                                                                                                                                                                                                                                                                                                                                                                                                                                                                                                                                                                                                                                                                                                                                                                                                                                                                                                                                                                                                                                                                                                                                                                                                                                                                                                                                                                                                                                                                                                                                                                                                                                                                                                                                                                                                                                                                                                                                                                                                                                                                                                                                                                                                                                                                                                                                                                                                                                                                                                                                              |



Parasitic infection  
0060,0061,0062,0063,0064,0065,0066,0068,0069,0070,0071,0072,0073,0074,0075,0078,0079,0840,0841,0842,0843,0844,0845,0846,0847,0848,0849,0850,0851,0852,0853,0854,0855,0859,0860,0861,0862,0863,0864,0865,0869,0882,0889,0889,1200,1201,1202,1203,1208,1209,1210,1211,1212,1213,1214,1215,1216,1218,1219,1220,1221,1222,1223,1224,1225,1226,1227,1228,1229,1230,1231,1232,1233,1234,1235,1236,1238,1239,124,125,1251,1252,1253,1254,1255,1256,1257,1259,1260,1261,1262,1263,1268,1269,1270,1271,1272,1273,1274,1275,1276,1277,1278,1279,1280,1281,1282,1283,1284,1285,1289,129,1300,1301,1302,1303,1304,1305,1309,1310,1311,13100,13101,13102,13103,13109,1318,1319,1320,1321,1322,1323,1329,1330,1338,1339,1340,1341,1342,1348,1349,135,136,1360,1361,1362,13621,13629,1363,1364,1365,1368,1369,1398,A060,A061,A062,A063,A064,A065,A066,A067,A0681,A0682,A0689,A069,A070,A071,A072,A073,A074,A078,A079,A5900,A5901,A5902,A5903,A5909,A598,A599,B500,B508,B509,B510,B518,B519,B520,B528,B529,B530,B531,B538,B54,B550,B551,B552,B559,B560,B561,B569,B570,B571,B572,B573,B574,B579,B5740,B5741,B5732,B5739,B5740,B5741,B5742,B5749,B575,B5800,B5801,B5802,B5803,B5804,B5805,B5806,B5807,B5808,B5809,B5810,B5811,B5812,B5813,B5819,B5820,B5829,B5830,B5831,B5832,B5833,B5834,B5838,B5839,B5850,B5851,B5852,B5853,B5854,B586,B5870,B5871,B5872,B5873,B5874,B5878,B5879,B5880,B5881,B5882,B5883,B5888,B5889,B589,B590,B600,B601,B6011,B6012,B6013,B6019,B602,B608,B64,B650,B651,B652,B653,B658,B659,B660,B661,B662,B663,B664,B665,B668,B669,B670,B671,B672,B6731,B6732,B6739,B674,B675,B6761,B6769,B677,B678,B6790,B6799,B680,B681,B689,B690,B691,B6981,B6989,B699,B700,B701,B710,B711,B718,B719,B72,B7300,B7301,B7302,B7309,B731,B740,B741,B742,B743,B744,B748,B749,B75,B760,B761,B768,B769,B770,B7781,B7789,B779,B780,B781,B787,B789,B79,B80,B810,B811,B812,B813,B814,B820,B829,B830,B831,B832,B833,B834,B838,B839,B850,B851,B852,B853,B854,B86,B870,B871,B872,B873,B874,B8781,B8782,B879,B880,B881,B882,B883,B888,B889,B89,B948,B949

Chronic kidney disease  
0001,0010,0011,0019,002,0020,0021,0022,0023,0029,003,0030,0031,0032,0033,0034,0039,004,0040,0041,0042,0043,0048,0049,005,0050,0051,0052,0053,0054,0058,00581,00589,0059,0

Infections (Excluding Parasitic)  
06,007,008,0080,00800,00801,00802,00803,00804,00809,0081,0082,0083,0084,00841,00842,00843,00844,00845,00846,00847,00849,0085,0086,00861,00862,00863,00864,00865,009,0090,0091,0092,0093,010,0100,01000,01001,01002,01003,01004,01005,01006,0101,01010,01011,01012,01013,01014,01015,01016,0108,01081,01082,01083,01084,01085,01086,0109,01090,01091,01092,01093,01094,01095,01096,011,0110,01100,01101,01102,01103,01104,01105,01106,0111,01110,01111,01112,01113,01114,01115,01116,01117,01118,01119,01120,01121,01122,01123,01124,01125,01126,0113,01130,01131,01132,01133,01134,01135,01136,0114,01140,01141,01142,01143,01144,01145,01146,0115,01150,01151,01152,01153,01154,01155,01156,0116,01160,01161,01162,01163,01164,01165,01166,0117,01170,01171,01172,01173,01174,01175,01176,0118,01181,01182,01183,01184,01185,01186,0119,01190,01191,01192,01193,01194,01195,01196,012,0120,01200,01201,01202,01203,01204,01205,01206,0121,01210,01211,01212,01213,01214,01215,01216,0122,01220,0121,01222,01223,01224,01225,01226,0123,01230,01231,01232,01233,01234,01235,01236,0128,01280,01281,01282,01283,01284,01285,01286,013,0130,01300,01301,01302,01303,01304,01305,01306,0131,01310,01311,01312,01313,01314,01315,01316,0132,01320,01321,01322,01323,01324,01325,01326,0133,01330,01331,01332,01333,01334,01335,01336,0134,01340,01341,01342,01343,01344,01345,01346,0135,01350,01351,01352,01353,01354,01355,01356,0136,01360,01361,01362,01363,01364,01365,01366,0138,01380,01381,01382,01383,01384,01385,01386,0139,01390,01391,01392,01393,01394,01395,01396,014,0140,01400,01401,01402,01403,01404,01405,01406,0148,01480,01481,01482,01483,01484,01485,01486,015,0150,01500,01501,01502,01503,01504,01505,01506,0151,01510,01511,01512,01513,01514,01515,01516,0152,01520,01521,01522,01523,01524,01525,01526,0155,01550,01551,01552,01553,01554,01555,01556,0156,01560,01561,01562,01563,01564,01565,01566,0157,01570,01571,01572,01573,01574,01575,01576,0158,01580,01581,01582,01583,01584,01585,01586,0159,01590,01591,01592,01593,01594,01595,01596,016,0160,01600,01601,01602,01603,01604,01605,01606,0161,01610,01611,01612,01613,01614,01615,01616,0162,01620,01621,01622,01623,01624,01625,01626,01627,0163,01630,01631,01632,01633,01634,01635,01636,0164,01640,01641,01642,01643,01644,01645,01646,0165,01650,01651,01652,01653,01654,01655,01656,0166,01660,01661,01662,01663,01664,01665,01666,0167,01670,01671,01672,01673,01674,01675,01676,0169,01690,01691,01692,01693,01694,01695,01696,017,0170,01700,01701,01702,01703,01704,01705,01706,0171,01710,01711,01712,01713,01714,01715,01716,0172,01720,01721,01722,01723,01724,01725,01726,0173,01730,01731,01732,01733,01734,01735,01736,0174,01740,01741,01742,01743,01744,01745,01746,0175,01750,01751,01752,01753,01754,01755,01756,0176,01760,01761,01762,0173,01763,01764,01765,01766,0177,01770,01771,01772,01773,01774,01775,01776,0178,01780,01781,01782,01783,01784,01785,01786,0179,01790,01791,01792,01793,01794,01795,01796,018,0180,01801,01802,01803,01804,01805,01806,0188,01880,01881,01882,01883,01884,01885,01886,0189,01890,01891,01892,01893,01894,01895,01896,02,020,0200,0201,0202,0203,0204,0205,0208,0209,021,0210,0211,0212,0213,0218,0219,022,0220,0221,0222,0223,0228,0229,023,0230,0231,0232,0233,0238,0239,024,025,026,0260,0261,0262,027,0270,0271,0272,0272,0279,0279,030,0300,0301,0302,0303,0308,0309,031,0310,0311,0312,0318,0319,0320,0321,0322,032

Primary & Secondary malignancy  
1731,1733,1734,1735,1736,1737,1738,1739,186,189,190,192,195,198,1988,199,2001,2002,2003,2004,2005,2006,2007,2008,2011,2012,2014,2015,2016,2017,2019,202,2021,2022,2023,2024,2025,2026,2027,2028,2029,203,2031,2038,204,2041,2042,2048,2049,205,2051,2052,2053,2058,2059,206,2061,2062,2068,2069,207,2071,2072,2078,2081,2082,2088,2089,2091,2092,2093,2094,2095,2096,2097,140,1400,1401,1404,1405,1414,1406,1408,1409,141,1410,1411,1412,1413,1414,1415,1416,1418,1419,1420,1421,1422,1428,1429,143,1430,1431,1438,1439,144,1440,1441,1448,1449,145,1450,1451,1452,1453,1454,1455,1456,1458,1459,146,1460,1461,1462,1463,1464,1465,1466,1467,1468,1469,147,1470,1471,1472,1473,1478,1479,1480,1481,1482,1483,1488,1489,149,1490,1491,1498,1499,150,1500,1501,1502,1503,1504,1505,1508,1509,1510,1511,1512,1513,1514,1515,1516,1518,1519,152,1520,1521,1522,1523,1528,1529,153,1530,1531,1532,1533,1534,1535,1536,1537,1538,1539,154,1540,1541,1542,1543,1548,155,1550,1551,1552,156,1560,1561,1562,1568,1569,157,1570,1571,1572,1573,1574,1578,1579,158,1580,1588,1589,159,1590,1591,1598,1599,160,1600,1601,1602,1603,1604,1605,1608,1609,161,1610,1611,1612,1613,1618,1619,162,1620,1622,1623,1624,1625,1628,1629,163,1630,1631,1638,1639,164,1640,1641,1642,1643,1648,1649,165,1650,1658,1659,170,1700,1701,1702,1703,1704,1705,1707,1708,1709,171,1710,1712,1713,1714,1715,1716,1717,1718,1719,172,1720,1721,1722,1723,1724,1726,1727,1728,1729,173,1730,17300,17301,17302,17309,17310,17311,17312,17319,1732,17320,17321,17322,17329,17330,17331,17332,17339,17340,17341,17342,17349,17350,17351,17352,17359,17360,17361,17362,17369,17370,17371,17372,17379,17380,17381,17382,17389,17390,17391,17392,17399,174,1740,1741,1742,1743,1744,1745,1746,1748,1749,175,1750,1759,176,1760,1761,1762,1763,1764,1765,1768,1769,179,180,1800,1801,1808,1809,181,182,1820,1821,1828,183,1830,1832,1833,1834,1835,1838,1839,184,1840,1841,1842,1843,1844,1848,1849,185,1860,1869,187,1871,1872,1873,1874,1875,1876,1877,1878,1879,188,1880,1881,1882,1883,1884,1885,1886,1887,1888,1889,1890,1891,1892,1893,1894,1898,1899,1900,1901,1902,1903,1904,1905,1906,1907,1908,1909,1920,1921,1922,1923,1928,1929,193,194,1940,1941,1943,1944,1945,1946,1948,1949,1950,1951,1952,1953,1954,1955,1958,196,1960,1961,1962,1963,1965,1966,1968,1969,197,1970,1971,1972,1973,1974,1975,1976,1977,1978,1980,1981,1982,1983,1984,1985,1986,1987,19881,19882,19889,1990,1991,1992,2000,20000,20000,20001,20002,20003,20004,20005,20006,20007,20008,20010,20011,20012,20013,20014,20015,20016,20017,20018,20019,20020,20021,20022,20023,20024,20025,20026,20027,20028,20030,20031,20032,20033,20034,20035,20036,20037,20038,20040,20041,20042,20043,20044,20045,20046,20047,20048,20050,20051,20052,20053,20054,20055,20056,20057,20058,20060,20061,20062,20063,20064,20065,20066,20067,20068,20070,20071,20072,20073,20074,20075,20076,20077,20078,20080,20081,20082,20083,20084,20085,20086,20087,20088,201,2010,20100,20101,20102,20103,20104,20105,20106,20107,20108,2010,20110,20111,20112,20113,20114,20115,20116,20117,20118,20120,20121,20122,20123,20124,20125,20126,20127,20128,20140,20141,20142,20143,20144,20145,20146,20147,20148,20150,20151,20152,20153,20154,20155,20156,20157,20158,20160,20161,20162,20163,20164,20165,20166,20167,20168,20170,20171,20172,20173,20174,20175,20176,20177,20178,20190,20191,20192,20193,20194,20195,20196,20197,20198,2020,20200,20201,20202,20203,20204,20205,20206,20207,20208,2021,20211,20212,20213,20214,20215,20216,20217,20218,20220,20221,20222,20223,20224,20225,20226,20227,20228,20230,20231,20232,20233,20234,20235,20236,20237,20238,20240,20241,20242,20243,20244,20245,20246,20247,20248,20250,20251,20252,20253,20254,20255,20256,20257,20258,20260,20261,20262,20263,20264,20265,20266,20267,20268,20270,20271,20272,20273,20274,20275,20276,20277,20278,20280,20281,20282,20283,20284,20285,20286,20287,20288,20290,20291,20292,20293,20294,20295,20296,20297,20298,2030,20300,20301,20302,20310,20311,20312,20313,20314,20315,20316,20317,20318,20319,20320,20321,20322,20323,20324,20325,20326,20327,20328,20329,20330,20331,20332,20333,20334,20335,20336,20337,20338,20339,20340,20341,20342,20343,20344,20345,20346,20347,20348,20349,20350,20351,20352,20353,20354,20355,20356,20357,20358,20359,20360,20361,20362,20363,20364,20365,20366,20367,20368,20369,20370,20371,20372,20373,20374,20375,20376,20377,20378,20379,20380,20381,20382,20383,20384,20385,20386,20387,20388,20389,20390,20391,20392,20393,20394,20395,20396,20397,20398,20399,20400,20401,20402,20403,20404,20405,20406,20407,20408,20409,20410,20411,20412,20413,20414,20415,20416,20417,20418,20419,20420,20421,20422,20423,20424,20425,20426,20427,20428,20429,20430,20431,20432,20433,20434,20435,20436,20437,20438,20439,20440,20441,20442,20443,20444,20445,20446,20447,20448,20449,20450,20451,20452,20453,20454,20455,20456,20457,20458,20459,20460,20461,20462,20463,20464,20465,20466,20467,20468,20469,20470,20471,20472,20473,20474,20475,20476,20477,20478,20479,20480,20481,20482,20483,20484,20485,20486,20487,20488,20489,20490,20491,20492,20493,20494,20495,20496,20497,20498,20499,20500,20501,20502,20503,20504,20505,20506,20507,20508,20509,20510,20511,20512,20513,20514,20515,20516,20517,20518,20519,20520,20521,20522,20523,20524,20525,20526,20527,20528,20529,20530,20531,20532,20533,20534,20535,20536,20537,20538,20539,20540,20541,20542,20543,20544,20545,20546,20547,20548,20549,20550,20551,20552,20553,20554,20555,20556,20557,20558,20559,20560,20561,20562,20563,20564,20565,20566,20567,20568,20569,20570,20571,20572,20573,20574,20575,20576,20577,20578,20579,20580,20581,20582,20583,20584,20585,20586,20587,20588,20589,20590,20591,20592,20593,20594,20595,20596,20597,20598,20599,20600,20601,20602,20603,20604,20605,20606,20607,20608,20609,20610,20611,20612,20613,20614,20615,20616,20617,20618,20619,20620,20621,20622,20623,20624,20625,20626,20627,20628,20629,20630,20631,20632,20633,20634,20635,20636,20637,20638,20639,20640,20641,20642,20643,20644,20645,20646,20647,20648,20649,20650,20651,20652,20653,20654,20655,20656,20657,20658,20659,20660,20661,20662,20663,20664,20665,20666,20667,20668,20669,20670,20671,20672,20673,20674,20675,20676,20677,20678,20679,20680,20681,20682,20683,20684,20685,20686,20687,20688,20689,20690,20691,20692,20693,20694,20695,20696,20697,20698,20699,20700,20701,20702,20703,20704,20705,20706,20707,20708,20709,20710,20711,20712,20713,20714,20715,20716,20717,20718,20719,20720,20721,20722,20723,20724,20725,20726,20727,20728,20729,20730,20731,20732,20733,20734,20735,20736,20737,20738,20739,20740,20741,20742,20743,20744,20745,20746,20747,20748,20749,20750,20751,20752,20753,20754,20755,20756,20757,20758,20759,20760,20761,20762,20763,20764,20765,20766,20767,20768,20769,20770,20771,20772,20773,20774,20775,20776,20777,20778,20779,20780,20781,20782,20783,20784,20785,20786,20787,20788,20789,20790,20791,20792,20793,20794,20795,20796,20797,20798,20799,20800,20801,20802,20803,20804,20805,20806,20807,20808,20809,20810,20811,20812,20813,20814,20815,20816,20817,20818,20819,20820,20821,20822,20823,20824,20825,20826,20827,20

|                              |                                                 |
|------------------------------|-------------------------------------------------|
| Mveloproliferative disorders | 23876,23879,2384,2385,23871,D4702,D473,D45,D471 |
|------------------------------|-------------------------------------------------|

**Medications**

| Medication                                       | OPTUM Class / Drug Name                                                                                                                                                                                                                                                                                                                                                                                                                                                                                                                                                                                                                                                                      |
|--------------------------------------------------|----------------------------------------------------------------------------------------------------------------------------------------------------------------------------------------------------------------------------------------------------------------------------------------------------------------------------------------------------------------------------------------------------------------------------------------------------------------------------------------------------------------------------------------------------------------------------------------------------------------------------------------------------------------------------------------------|
| Diuretics                                        | <ol style="list-style-type: none"> <li>1. Diuretic combinations</li> <li>2. Diuretics; miscellaneous</li> <li>3. Antihypertensive combinations; beta blocker &amp; thiazide diuretic</li> <li>4. Loop diuretics</li> <li>5. Osmotic diuretics</li> <li>6. Potassium-sparing diuretics</li> </ol>                                                                                                                                                                                                                                                                                                                                                                                             |
| Angiotensin-converting enzyme inhibitors (ACEIs) | <ol style="list-style-type: none"> <li>1. Angiotensin-converting enzyme (ACE) inhibitors</li> </ol>                                                                                                                                                                                                                                                                                                                                                                                                                                                                                                                                                                                          |
| Angiotensin II receptor blockers (ARBs)          | <ol style="list-style-type: none"> <li>1. Angiotensin II receptor antagonists (ARB)</li> </ol>                                                                                                                                                                                                                                                                                                                                                                                                                                                                                                                                                                                               |
| Beta blockers                                    | <ol style="list-style-type: none"> <li>1. Beta-adrenergic antagonists (beta blockers) w/o ISA</li> <li>2. Beta-adrenergic antagonists; glaucoma treatment</li> <li>3. Alpha- &amp; beta-adrenergic antagonists</li> </ol>                                                                                                                                                                                                                                                                                                                                                                                                                                                                    |
| Calcium channel blockers                         | <ol style="list-style-type: none"> <li>1. Calcium channel antagonists (calcium channel blockers)</li> </ol>                                                                                                                                                                                                                                                                                                                                                                                                                                                                                                                                                                                  |
| Statins                                          | <ol style="list-style-type: none"> <li>1. HMG &amp; CoA reductase inhibitors (statins)</li> <li>2. HMG &amp; CoA reductase inhibitor combinations; statin &amp; various</li> </ol>                                                                                                                                                                                                                                                                                                                                                                                                                                                                                                           |
| Antiplatelet drugs                               | <ol style="list-style-type: none"> <li>1. Antiplatelets or aggregation inhibitors</li> <li>2. Antiplatelet agents; glycoprotein IIb/IIIa inhibitors</li> <li>3. Antiplatelet combinations</li> </ol>                                                                                                                                                                                                                                                                                                                                                                                                                                                                                         |
| Hematopoietic agents                             | <ol style="list-style-type: none"> <li>1. Hematopoietic agents</li> </ol>                                                                                                                                                                                                                                                                                                                                                                                                                                                                                                                                                                                                                    |
| Immunosuppressive agents                         | <ol style="list-style-type: none"> <li>1. Systemic glucocorticoids</li> <li>2. Immunologics; immunosuppressive</li> </ol>                                                                                                                                                                                                                                                                                                                                                                                                                                                                                                                                                                    |
| Cytotoxic agents                                 | <ol style="list-style-type: none"> <li>1. Antimetabolite</li> <li>2. Alkylating agents</li> <li>3. Antineoplastic antibiotics; miscellaneous</li> </ol>                                                                                                                                                                                                                                                                                                                                                                                                                                                                                                                                      |
| Proton pump inhibitors (PPI)                     | <ol style="list-style-type: none"> <li>1. Proton pump inhibitors (PPI)</li> </ol>                                                                                                                                                                                                                                                                                                                                                                                                                                                                                                                                                                                                            |
| Antibiotics                                      | <ol style="list-style-type: none"> <li>1. Otic antibiotics</li> <li>2. Ophthalmic antibiotic combinations</li> <li>3. Otic steroid &amp; antibiotic combinations</li> <li>4. Antibiotics; miscellaneous</li> <li>5. Anthracycline antibiotics</li> <li>6. Ophthalmic steroid &amp; antibiotic combinations</li> <li>7. Ophthalmic antibiotics; miscellaneous</li> <li>8. Beta-lactam antibiotics; miscellaneous</li> </ol>                                                                                                                                                                                                                                                                   |
| Non-steroidal anti-inflammatory (NSAID)          | <ol style="list-style-type: none"> <li>1. Non-steroidal anti-inflammatory (NSAID) agents</li> <li>2. NSAIDs; cyclooxygenase-2 (COX-2) inhibitors</li> <li>3. Non-steroidal anti-inflammatory (NSAID) combinations; various</li> </ol>                                                                                                                                                                                                                                                                                                                                                                                                                                                        |
| Iron                                             | <ol style="list-style-type: none"> <li>1. Iron</li> <li>2. Iron combination products; miscellaneous</li> </ol>                                                                                                                                                                                                                                                                                                                                                                                                                                                                                                                                                                               |
| Systemic Steroids                                | <ol style="list-style-type: none"> <li>1. Systemic glucocorticoids</li> </ol>                                                                                                                                                                                                                                                                                                                                                                                                                                                                                                                                                                                                                |
| Diabetes                                         | <ol style="list-style-type: none"> <li>1. Insulin</li> <li>2. Antidiabetic agents; amylin analogs</li> <li>3. Glucagon-like peptide 1 receptor agonists; and other misc. diabetes agents</li> <li>4. Insulin &amp; other antidiabetic medication</li> <li>5. Antidiabetic agents; meglitinides</li> <li>6. Antidiabetic agents; biguanides</li> <li>7. Antidiabetic agents; sulfonylurea</li> <li>8. Antidiabetic agents; alpha-glucosidase inhibitors</li> <li>9. Sodium-glucose co-transporter 2 inhibitors</li> <li>10. Antidiabetic agents; dipeptidyl peptidase inhibitors</li> <li>11. Antidiabetic combination agents</li> <li>12. Antidiabetic agents; thiazolidinediones</li> </ol> |

**Medication J codes**

| Medication | J codes |
|------------|---------|
|------------|---------|

|                                 |                                                                                                                                                                                                                                                                                                                                                                                                                                                                                                                                                                                                                                                                                                                                                                                                                                                                                                                                                                                                                                                                                                                                                                                                                                                                                                                                                                                                                                                                                                                                                                                                                                                                                                                                                                                                                                                                                                                                                                                                                                                                                                                                                                                                                                                                                                                                                                                                                                                                                                                                                                                                                                                                                                                                                                                                                                                                                                                                                                                                                                                                                                                                                                                                                                                                                                                                                                                                                                                                                                                                                                                                                                                                                                                                                                                                                                                                                                                                                                                                                                                                                                                                                                                            |
|---------------------------------|--------------------------------------------------------------------------------------------------------------------------------------------------------------------------------------------------------------------------------------------------------------------------------------------------------------------------------------------------------------------------------------------------------------------------------------------------------------------------------------------------------------------------------------------------------------------------------------------------------------------------------------------------------------------------------------------------------------------------------------------------------------------------------------------------------------------------------------------------------------------------------------------------------------------------------------------------------------------------------------------------------------------------------------------------------------------------------------------------------------------------------------------------------------------------------------------------------------------------------------------------------------------------------------------------------------------------------------------------------------------------------------------------------------------------------------------------------------------------------------------------------------------------------------------------------------------------------------------------------------------------------------------------------------------------------------------------------------------------------------------------------------------------------------------------------------------------------------------------------------------------------------------------------------------------------------------------------------------------------------------------------------------------------------------------------------------------------------------------------------------------------------------------------------------------------------------------------------------------------------------------------------------------------------------------------------------------------------------------------------------------------------------------------------------------------------------------------------------------------------------------------------------------------------------------------------------------------------------------------------------------------------------------------------------------------------------------------------------------------------------------------------------------------------------------------------------------------------------------------------------------------------------------------------------------------------------------------------------------------------------------------------------------------------------------------------------------------------------------------------------------------------------------------------------------------------------------------------------------------------------------------------------------------------------------------------------------------------------------------------------------------------------------------------------------------------------------------------------------------------------------------------------------------------------------------------------------------------------------------------------------------------------------------------------------------------------------------------------------------------------------------------------------------------------------------------------------------------------------------------------------------------------------------------------------------------------------------------------------------------------------------------------------------------------------------------------------------------------------------------------------------------------------------------------------------------------|
| <p>Cytotoxic Agents</p>         | <p>J9190,J9060,J9263,J9060,J9185,J9040,J9260,J9090,J9100,J9263,J9070,J9250,J9100,J9280,J9040,J9070,J9065,J9190,J8530,J9190,J8610,J9045,J9045,J9263,J9190,J9263,J9190,J9201,J9190,J9280,J9190,J9025,J9045,J0894,J9280,J9260,J8610,J9045,J9190,J9045,J9208,J8521,J9040,J9320,J9280,A9270,J9260,J9190,J9045,J9201,J9060,J9280,J9250,J9185,J9070,J9260,J9070,J9130,J9280,J9307,J9025,J9045,J8610,J0894,J9201,J9040,J8521,J9065,J9307,J9185,J9250,J9091,J9091,J9060,J9208,J9260,J9033,J9130,J9263,J9190,J9060,J9140,J9070,J9280,J0894,J9263,J0894,J9260,J9320,J9268,J9260,J9340,J9340,J9280,J9250,J9040,J9190,J9291,J9060,J9065,J9201,J9070,J9250,J9263,J9040,J8610,J9062,J9060,J9033,J9260,J0894,J0894,J9045,J8521,G0482,J9290,J9201,J9263,J9070,J9045,J9070,J0894,J9263,J9260,J8610,J9025,J9065,J9260,J9250,J9070,J9034,J9050,J9062,J9280,J9208,J9290,J9190,J9070,J9190,J9045,J9280,J9065,J9040,J9263,J9260,J9045,J9263,J9100,J9070,J8610,J9185,J9307,J9033,J8530,J9040,J9293,J9260,J9263,J9045,J9201,J0894,J9260,J9263,J9263,J9130,J9130,J9100,J9280,J9208,J9045,J9062,J9070,J9090,J9291,J9060,J9100,J9040,J9080,J0894,J9250,J8520,J8530,J9045,J9060,J9070,J9201,J9060,J9190,J9070,J9263,J9060,J9100,J9025,J9185,J9130,J9025,J8521,J9250,J9185,J9190,J9190,J9090,J9201,J9190,J9045,J9250,J9208,J9290,J9250,J9045,J9033,J9062,J9100,J9040,J9250,J9040,J9208,J9045,J8530,J9025,J9060,J9280,J9040,J9280,J9065,J9263,J9250,J9070,J9263,J9025,J9070,J9263,J0894,J9263,J9190,J8610,J9280,J9060,J9070,J9100,J9268,J9140,J9201,J9190,J9045,J8610,J9263,J9190,J9090,J9208,J9025,J8521,J9260,J9091,J9110,J9025,S0108,J9280,J9280,J9201,J9250,J9070,J9260,J9130,J9034,J9208,J9025,J9208,J9130,J9190,J9070,J9100,J9045,S0108,J9025,J9260,J9045,J9025,J9280,J9025,J9280,J9045,J9100,J9070,J9190,J9260,J9100,J9027,J9260,J9130,G0480,J9260,J9291,J9025,J9190,J9045,J9190,J9130,J9060,J9025,J9070,J9185,J0894,J9208,J9027,J9045,J9120,J9280,J9280,J9352,J9027,J9307,J9100,J9098,A9270,J9045,J9045,J9190,J0894,J8530,J9280,J8610,J9208,J9263,J9100,J9201,J9208,J9040,J9245,J8520,J9190,J9070,J9190,J9060,J9060,J9070,J9263,J9263,J9260,J9100,J9070,J9091,J9250,J9307,J9100,J9260,J9033,J9062,J9140,J9280,J9070,J9280,J9060,J9045,J9185,J9130,J9280,J9291,J9130,J9190,J9280,J9045,J9208,J9060,J9307,J9260,J0894,J9352,J9120,J9190,J9280,J9100,J9120,J9263,J8600,J9190,J9201,J9190,J9130,J9263,J9185,J9040,J8610,J9025,A9270,J9045,J9025,C9480,J9033,J9060,J9293,J9060,J8521,J9290,J9260,J9280,J9045,J9040,J9208,J9250,J9040,J9025,J9040,J9100,J9190,J9120,J9070,J9100,J9190,J9208,J9280,J9060,J9025,J9201,J9280,J9280,J9098,J9260,J9280,J9280,J9060,J9268,J9999</p>                                                                                                                                                                                                                                                                                                                                                                                                                                                                                                                                                                                                                                                                                                                                                                                                                                                                                                                                                                                                                                                                                                                                                                                                                                                                                                                                                                                                                                                                                                                                           |
| <p>Immunosuppressive agents</p> | <p>J1040,J1100,J2930,J1720,J3301,J1100,J1100,J3301,J7512,J1720,J8540,J1100,J1100,J1100,J2930,J7515,J8499,J1040,J1100,J2930,A9270,J8540,A9270,J1720,A9270,J1720,J1720,J1100,J1100,J7506,J1100,J2930,J1100,A9270,J1100,J1040,J1100,J1720,J7506,J2930,J1040,J1100,J2930,A9270,A9270,J1030,J1720,J1040,J1020,J2930,J7502,J7510,J2920,J1100,J7512,A9270,J0480,J1100,J8540,J7506,J2930,J7517,J1030,A9270,J7502,J7515,J7510,J8540,J1020,J1100,J1040,J7506,J1030,J1100,J1100,J7510,J1020,J7512,J3301,J8540,J1020,J1094,J7512,J7515,J1020,J3301,A9270,J7507,J2930,J3301,A9270,J2930,J8540,J7515,A9270,G6035,J1094,J7506,J1020,J1020,J1100,J1030,J1700,J1720,J1094,J1720,J1100,J3301,J2930,J1100,J1040,J2930,A9270,J7510,J1020,J1100,J1094,J1094,J1094,J7502,A9270,J2920,J7510,J1030,J7502,J3301,J7516,X6004,J7520,J1720,A9270,J7517,J7510,J1100,J7506,J8540,J2920,J1030,J1030,J2930,J2930,J7500,J1040,J1100,J3303,J1030,J7510,J1030,A9270,J1094,J2930,J8540,J1094,A9270,J3301,J3301,J7509,J7506,J7507,J3301,A9270,J2930,J9999,J7638,J3301,J2930,J1100,J1100,J2920,J1094,J7510,J8540,J1030,J2920,J7512,A9270,J1030,J1030,J7510,J1020,J3300,J1100,A9270,J7509,J7506,J2930,J7515,J8540,J2930,J1720,A9270,J1030,A9270,J1020,J1100,J0702,J7512,J1040,J1100,J2920,J3301,J2930,J2930,J1030,J8540,J2920,A9270,J7507,J7510,J2930,J2920,J3301,J2930,J1100,J7515,J7507,J2930,J1040,J2920,J8540,J7520,J7512,S0173,J1720,A9270,J7506,J1100,J1100,J1040,J2920,J2930,J3301,J1030,J1030,J1100,J1040,J7512,J7506,A9270,J1030,J2920,A9270,J1020,J2930,J7502,J1040,J1100,J9330,J7512,J2920,A9270,J7506,J9330,J2920,J1040,J7507,J1030,J1720,J3303,J3300,J7512,J7506,J2930,J2930,J0702,J7509,J1020,J1100,J1094,J2920,J7507,J1100,J3301,J8540,J2920,J2930,J9070,J1020,J3301,J2920,J1094,J1100,J1030,J1100,J3300,A9270,J2930,A9270,J1720,J9330,J7510,J1100,J2930,J7512,J2920,A9270,J1040,J1100,J7507,J1040,J1094,J7510,J3301,J1040,J2930,J1030,J2930,J1100,J1100,A9270,J7500,J1020,J7507,J2930,A9270,J1040,J1100,J7517,J8540,J3301,J2930,J8530,J1020,J1040,J9330,J7512,A9270,A9270,J7520,J2930,J1100,J1100,J7512,J1100,J2930,J1030,J1100,J2920,J1094,J7517,J1100,J1100,J3301,J1100,J1040,J3300,J1040,J1040,J2930,J2930,A9270,A9270,J3303,J7500,J1040,J7520,J7502,J1040,J8540,J2930,J1094,J1720,J2920,J7502,J7507,J7516,J7527,J7510,G0480,J7520,J2930,J3301,J1100,J1020,J3301,J2930,J1020,J1040,J1040,J2930,J1100,J7512,A9270,J7507,J7506,J3302,J1100,J1030,J1030,J2930,J1094,J1094,J2930,J7506,J2920,J7502,J2920,J1100,J7512,J1100,J1094,J2920,J2920,J7512,J2930,J1100,J7506,J3301,J3301,J1720,J1100,J1100,J7506,J7500,J1100,J1030,J2930,J1040,J7509,J8540,J7512,J1030,J1720,J2930,J2930,J7512,J3301,J1720,J7507,J2930,J7500,J7506,A9270,A9270,J1100,J7510,J1040,J3301,J2920,J1720,J8540,J1040,J1030,J3303,J1100,J7512,J1030,J2930,J1040,J1040,J1040,J1040,J1030,J1040,J1100,A9270,J7515,J1720,J7506,A9270,J7502,J7502,A9270,J3303,J7502,J2930,J1720,J7312,A9270,J7520,J3301,J1100,J3301,J2920,J1040,J1720,J8540,J1720,J7500,J2930,J1100,J7500,J3301,J1100,J9070,J1720,J1720,J3301,J7506,J1100,J1030,J7507,J1030,J9330,J1030,J7506,J1720,J2930,J8540,J1030,J7510,J8540,J2930,J7506,J1030,J7512,J7506,J7507,J2930,J2930,J1100,J7512,J9330,J3300,J1100,A9270,J2930,J7507,J1020,J7506,J7500,J1720,J7637,J1100,J1720,J7510,A9270,A9270,J9330,J1030,J1040,J1720,A9270,J7506,A9270,J1100,J1100,J7506,J1020,J7510,J1040,J3303,J3301,J7512,J2930,J2930,J7512,J7510,J7520,J2930,J7506,J7500,J7515,J3301,J1030,J2930,J9330,A9270,X5554,J7506,J2920,J1020,J1030,J7512,J1100,J2930,J7512,J7500,J3301,J1100,J2920,J8540,J1100,J8540,J1720,J1100,J3301,A9270,J1040,A9270,A9270,J1100,J7512,J8540,J1040,J1020,J1040,J7510,J2920,J7515,A9270,J1100,J9330,J1020,J2920,J1020,J1030,J3303,J2930,J2930,J7506,J2930,J7506,J1100,J1720,J7506,J7512,J2920,J3301,J1100,J7517,J1030,J2930,J1100,J1040,J8540,A9270,J1720,J2930,J3303,J8540,J3303,J1020,J7502,J7506,J7502,J2920,J9330,J8530,J2920,J2930,J7520,J1094,J3301,J1030,J7512,J1720,J7506,J8540,J2930,J7638,J1030,J1100,J2920,J1720,J2930,J2920,J7512,J1100,J2930,A9270,J3301,J1100,J3301,J2930,A9270,J1094,J1030,J8540,J7517,A9270,J7507,J7509,J7512,J7509,J8540,J7638,J7512,J1030,J7510</p> |

**Severity Test for select comorbidities**

| Comorbidity         | Tests (OPTUM)                                                                             | Comorbidity Types / Severity                                                                                                                                                                                                                                          |
|---------------------|-------------------------------------------------------------------------------------------|-----------------------------------------------------------------------------------------------------------------------------------------------------------------------------------------------------------------------------------------------------------------------|
| Anemia              | a. Hemoglobin (HGB)                                                                       | a. High (Hemoglobin: >18 g/dl)<br>b. Normal (Hemoglobin: 12-18 g/dl)<br>c. Mild (Hemoglobin: 10.0-11.9 g/dl )<br>d. Moderate (Hemoglobin: 7.0-9.9 g/dl)<br>e. Severe (Hemoglobin: less than 7.0 g/dl)                                                                 |
| Diabetes            | a. Hemoglobin A1c                                                                         | a. Non-Diabetic (HA1C<6.5 )<br>b. Good Diabetic Control (HA1C 6.5- 7.5)<br>c. Fair Diabetic Control (HA1C 7.5 - 8.5)<br>d. Poor Diabetic Control ( HA1C 8.5-10)<br>e. Severe Diabetic (HA1C 10+)                                                                      |
| Dyslipidemia        | a. Triglycerides (TG)<br>b. Cholesterol.HDL<br>c. Cholesterol.LDL<br>d. Cholesterol.total | Severity:<br>a. Normal High (Total<200 mg/dL, LDL=< 130 mg/dL, HDL> 59 mg/dL, TG<150 mg/dL)<br>b. Borderline High (Total=200-239 mg/dL, LDL=130-159 mg/dL, HDL=40-59 mg/dL, TG=150-199 mg/dL)<br>c. High (Total≥240 mg/dL, LDL≥160 mg/dL, HDL<40 mg/dL, TG>200 mg/dL) |
| Hypertension        | a. SBP<br>b. DBP                                                                          | a. Normal (SBP: <129, DBP:<80)<br>b. Stage 1 (SBP: 130-139, DBP: 80-89)<br>c. Stage 2 (SBP: 140-179, DBP:90-119)<br>d. Stage 3 (SBP:180+, DBP: 120+)                                                                                                                  |
| Proteinuria         | a. Albumin/creatinine ratio.urine                                                         | 1. Normal - 30mg/g ACR( Albumin Creatine Ratio)<br>2. Moderate - 30-300 mg/g ACR<br>3. Severe - 300-2,200 mg/g ACR<br>4. Nephrotic range proteinuria > 2,200 mg/g ACR                                                                                                 |
| Sickle Cell Disease | a. Hemoglobin S.percent                                                                   | Normal: Hemoglobin S percent =0<br>Severe: Hemoglobin S percent >0                                                                                                                                                                                                    |
| Hyperthyroidism     | a. Thyroxine.total (T4)<br>b. Thyroid stimulating hormone (TSH)                           | Normal: T4 <12ug/dl or TTSH >0.4 mU/L<br>Severere: T4 > 12ug/dl , and serum TTSH <0.4 mU / L                                                                                                                                                                          |
| Obesity             | a. BMI                                                                                    | a. Underweight (BMI < 18.5)<br>b. Normal weight (BMI of 18.5-24.9)<br>c. Overweight (BMI of 25-29.9)<br>d. Obese (BMI > 30)<br>e. Morbidly obese (BMI is over 40)                                                                                                     |

**Laboratory Test**

| Laboratory Test                   | OPTUM Name                     | Severity Ranges                                                                                                                                                                                                                                                   |
|-----------------------------------|--------------------------------|-------------------------------------------------------------------------------------------------------------------------------------------------------------------------------------------------------------------------------------------------------------------|
| Serum uric acid levels            | Uric acid                      | Normal: 2.4-7.0 mg/dL<br>Low: <2.4 mg/dL<br>High: >7.0 mg/dL                                                                                                                                                                                                      |
| Albumin-to-creatinine ratio (ACR) | Albumin/creatinine ratio.urine | A1 (normal): <30 mg/g<br>A2 (moderate severe): 30-300 mg/g<br>A3 (severe): >300 mg/g                                                                                                                                                                              |
| Hemoglobin                        | Hemoglobin (HGB)               | Normal: >12 g/dl<br>Mild: 10.0-11.9 g/dl<br>Moderate: 7.0-9.9 g/dl<br>Severe: <7.0 g/dl                                                                                                                                                                           |
| Serum bicarbonate                 | Bicarbonate (HCO3)             | Low: <23 mEq/L<br>Normal: 23-30 mEq/L<br>High: >30 mEq/L                                                                                                                                                                                                          |
| Serum phosphate                   | Phosphorus (PO4)               | Normal range: 2.5-4.5 mg/dL<br>Hypophosphatemia moderate severity: 1.5-2.4 mg/dL<br>Hypophosphatemia severe: 1-1.5 mg/dL<br>Hypophosphatemia extremely severe: <1 mg/dL<br>Hyperphosphatemia mild severity: 4.5-6.5 mg/dL<br>Hyperphosphatemia severe: >6.6 mg/dL |



**Table S3. CKD Common Medications**

| <b>Medication</b>                        | <b>Optum Class / Drug Name</b>                                                                                                                                                                                                                                                                 |
|------------------------------------------|------------------------------------------------------------------------------------------------------------------------------------------------------------------------------------------------------------------------------------------------------------------------------------------------|
| Diuretic                                 | Diuretic combinations<br>Diuretics; miscellaneous<br>Antihypertensive combinations; beta blocker & thiazide diuretic<br>Loop diuretics<br>Osmotic diuretics<br>Potassium-sparing diuretics                                                                                                     |
| Angiotensin-converting enzyme inhibitors | Angiotensin-converting enzyme inhibitors                                                                                                                                                                                                                                                       |
| Angiotensin II receptor blockers         | Angiotensin II receptor antagonists                                                                                                                                                                                                                                                            |
| Beta blockers                            | Beta-adrenergic antagonists (beta blockers) w/o ISA<br>Beta-adrenergic antagonists; glaucoma treatment<br>Alpha- & beta-adrenergic antagonists                                                                                                                                                 |
| Calcium channel blockers                 | Calcium channel antagonists (calcium channel blockers)                                                                                                                                                                                                                                         |
| Statins                                  | HMG-CoA reductase inhibitors (statins)<br>HMG-CoA reductase inhibitor combinations; statin & various                                                                                                                                                                                           |
| Antiplatelet drugs                       | Antiplatelets or aggregation inhibitors<br>Antiplatelet agents; glycoprotein IIb/IIIa inhibitors<br>Antiplatelet combinations                                                                                                                                                                  |
| Hematopoietic agents                     | Hematopoietic agents                                                                                                                                                                                                                                                                           |
| Immunosuppressive agents                 | Systemic glucocorticoids<br>Immunologics; immunosuppressive                                                                                                                                                                                                                                    |
| Cytotoxic agents                         | Antimetabolite<br>Alkylating agents<br>Antineoplastic antibiotics; miscellaneous                                                                                                                                                                                                               |
| Proton pump inhibitors                   | Proton pump inhibitors                                                                                                                                                                                                                                                                         |
| Antibiotics                              | Otic antibiotics<br>Ophthalmic antibiotic combinations<br>Otic steroid & antibiotic combinations<br>Antibiotics; miscellaneous<br>Anthracycline antibiotics<br>Ophthalmic steroid & antibiotic combinations<br>Ophthalmic antibiotics; miscellaneous<br>Beta-lactam antibiotics; miscellaneous |

|                                 |                                                                                                                                                                                                                                                                                                                                                                                                                                                                                                                               |
|---------------------------------|-------------------------------------------------------------------------------------------------------------------------------------------------------------------------------------------------------------------------------------------------------------------------------------------------------------------------------------------------------------------------------------------------------------------------------------------------------------------------------------------------------------------------------|
| Non-steroidal anti-inflammatory | Non-steroidal anti-inflammatory (NSAID) agents<br>NSAIDs; cyclooxygenase-2 inhibitors<br>NSAID combinations; various                                                                                                                                                                                                                                                                                                                                                                                                          |
| Iron                            | Iron<br>Iron combination products; miscellaneous                                                                                                                                                                                                                                                                                                                                                                                                                                                                              |
| Systemic steroids               | Systemic glucocorticoids                                                                                                                                                                                                                                                                                                                                                                                                                                                                                                      |
| Diabetes                        | Insulin<br>Antidiabetic agents; amylin analogs<br>Glucagon-like peptide 1 receptor agonists; and other misc. diabetes agents<br>Insulin & other antidiabetic medication<br>Antidiabetic agents; meglitinides<br>Antidiabetic agents; biguanides<br>Antidiabetic agents; sulfonylurea<br>Antidiabetic agents; alpha-glucosidase inhibitors<br>Sodium-glucose co-transporter 2 inhibitors<br>Antidiabetic agents; dipeptidyl peptidase inhibitors<br>Antidiabetic combination agents<br>Antidiabetic agents; thiazolidinediones |

---

ISA=intrinsic sympathomimetic activity; HMG-CoA= 3-hydroxymethyl-3-methylglutaryl coenzyme A; NSAID=non-steroidal anti-inflammatory

**Table S4. Follow-up Characteristics of Patient Episodes**

| Characteristic                | Stage 3 to 3     |                 |                |                | Stage 3 to 4/5  |                 |                 |                | Stage 4 to 4    |                |                |                | Stage 4 to 5    |                 |                 |                |
|-------------------------------|------------------|-----------------|----------------|----------------|-----------------|-----------------|-----------------|----------------|-----------------|----------------|----------------|----------------|-----------------|-----------------|-----------------|----------------|
| Episode no.<br>(%)            | 257786<br>(85.5) | 33192<br>(11.0) | 10161<br>(3.4) | 454<br>(0.2)   | 22236<br>(80.0) | 4146<br>(14.9)  | 1348<br>(4.9)   | 60<br>(0.2)    | 38563<br>(84.0) | 5474<br>(11.9) | 1773<br>(3.9)  | 79<br>(0.2)    | 6511<br>(77.2)  | 1389<br>(16.5)  | 515<br>(6.1)    | 21<br>(0.3)    |
| EOS count<br>(cells/ $\mu$ l) | 0-<br>299        | 300-<br>499     | 500-<br>1499   | $\geq$ 1500    | 0-<br>299       | 300-<br>499     | 500-<br>1499    | $\geq$ 1500    | 0-<br>299       | 300-<br>499    | 500-<br>1499   | $\geq$ 1500    | 0-<br>299       | 300-<br>499     | 500-<br>1499    | $\geq$ 1500    |
| <b>BMI</b>                    |                  |                 |                |                |                 |                 |                 |                |                 |                |                |                |                 |                 |                 |                |
| Normal                        | 67044<br>(26.0)  | 6751<br>(20.3)  | 2280<br>(22.4) | 143<br>(31.5)  | 4577<br>(20.6)  | 625<br>(15.1)   | 241<br>(17.9)   | 16<br>(26.7)   | 10253<br>(26.6) | 1180<br>(21.6) | 381<br>(21.5)  | 30<br>(38.0)   | 1316<br>(20.2)  | 206<br>(14.8)   | 87<br>(16.9)    | 6<br>(28.6)    |
| Morbid Obese                  | 21891<br>(8.5)   | 3509<br>(10.6)  | 934<br>(9.2)   | 26<br>(5.7)    | 2151<br>(9.7)   | 518<br>(12.5)   | 140<br>(10.4)   | 1<br>(1.7)     | 3122<br>(8.1)   | 570<br>(10.4)  | 138<br>(7.8)   | 4<br>(5.1)     | 612<br>(9.4)    | 171<br>(12.3)   | 56<br>(10.9)    | 6<br>(28.6)    |
| Obese                         | 70462<br>(27.3)  | 10119<br>(30.5) | 2942<br>(29.0) | 112<br>(24.7)  | 6145<br>(27.6)  | 1234<br>(29.8)  | 386<br>(28.6)   | 18<br>(30.0)   | 9659<br>(25.0)  | 1490<br>(27.2) | 473<br>(26.7)  | 10<br>(12.7)   | 1711<br>(26.3)  | 400<br>(28.8)   | 127<br>(24.7)   | 4<br>(19.0)    |
| Overweight                    | 65597<br>(25.4)  | 8567<br>(25.8)  | 2575<br>(25.3) | 115<br>(25.3)  | 4956<br>(22.3)  | 911<br>(22.0)   | 307<br>(22.8)   | 9<br>(15.0)    | 9091<br>(23.6)  | 1299<br>(23.7) | 423<br>(23.9)  | 22<br>(27.8)   | 1291<br>(19.8)  | 287<br>(20.7)   | 122<br>(23.7)   | 3<br>(14.3)    |
| Underweight                   | 10496<br>(4.1)   | 767<br>(2.3)    | 232<br>(2.3)   | 15<br>(3.3)    | 669<br>(3.0)    | 68<br>(1.6)     | 23<br>(1.7)     | 0<br>(0.0)     | 2001<br>(5.2)   | 131<br>(2.4)   | 53<br>(3.0)    | 2<br>(2.5)     | 243<br>(3.7)    | 20<br>(1.4)     | 9<br>(1.7)      | 0<br>(0.0)     |
| Unknown                       | 22296<br>(8.6)   | 3479<br>(10.5)  | 1198<br>(11.8) | 43<br>(9.5)    | 3738<br>(16.8)  | 790<br>(19.1)   | 251<br>(18.6)   | 16<br>(26.7)   | 4437<br>(11.5)  | 804<br>(14.7)  | 305<br>(17.2)  | 11<br>(13.9)   | 1338<br>(20.5)  | 305<br>(22.0)   | 114<br>(22.1)   | 2<br>(9.5)     |
| <b>Smoking</b>                |                  |                 |                |                |                 |                 |                 |                |                 |                |                |                |                 |                 |                 |                |
| Current                       | 30278<br>(11.7)  | 3563<br>(10.7)  | 1094<br>(10.8) | 54<br>(11.9)   | 2601<br>(11.7)  | 460<br>(11.1)   | 155<br>(11.5)   | 7<br>(11.7)    | 4762<br>(12.3)  | 617<br>(11.3)  | 189<br>(10.7)  | 11<br>(13.9)   | 839<br>(12.9)   | 149<br>(10.7)   | 54<br>(10.5)    | 6<br>(28.6)    |
| Never                         | 105343<br>(40.9) | 12304<br>(37.1) | 3688<br>(36.3) | 164<br>(36.1)  | 3858<br>(35.3)  | 1263<br>(30.5)  | 429<br>(31.8)   | 13<br>(21.7)   | 15153<br>(39.3) | 1876<br>(34.3) | 538<br>(30.3)  | 24<br>(30.4)   | 2143<br>(32.9)  | 431<br>(31.0)   | 144<br>(28.0)   | 6<br>(28.6)    |
| Not current                   | 10139<br>(3.9)   | 1289<br>(3.9)   | 403<br>(4.0)   | 25<br>(5.5)    | 942<br>(4.2)    | 161<br>(3.9)    | 44<br>(3.3)     | 5<br>(8.3)     | 1591<br>(4.1)   | 213<br>(3.9)   | 69<br>(3.9)    | 4<br>(5.1)     | 316<br>(4.9)    | 60<br>(4.3)     | 23<br>(4.5)     | 0<br>(0.0)     |
| Previously                    | 80220<br>(31.1)  | 11368<br>(34.2) | 3483<br>(34.3) | 152<br>(33.5)  | 6508<br>(29.3)  | 1353<br>(32.6)  | 440<br>(32.6)   | 22<br>(36.7)   | 11647<br>(30.2) | 1851<br>(33.8) | 612<br>(34.5)  | 27<br>(34.2)   | 1780<br>(27.3)  | 421<br>(30.3)   | 161<br>(31.3)   | 6<br>(28.6)    |
| Unknown                       | 31806<br>(12.3)  | 4668<br>(14.1)  | 1493<br>(14.7) | 59<br>(13.0)   | 4327<br>(19.5)  | 909<br>(21.9)   | 280<br>(20.8)   | 13<br>(21.7)   | 5410<br>(14.0)  | 917<br>(16.8)  | 365<br>(20.6)  | 13<br>(16.5)   | 1433<br>(22.0)  | 328<br>(23.6)   | 133<br>(25.8)   | 3<br>(14.3)    |
| <b>Mortality</b>              |                  |                 |                |                |                 |                 |                 |                |                 |                |                |                |                 |                 |                 |                |
| Mean time to<br>death         | 546<br>(397.9)   | 561<br>(398.0)  | 550<br>(387.5) | 538<br>(420.4) | 1052<br>(528.3) | 1044<br>(516.4) | 1055<br>(539.3) | 850<br>(550.3) | 523<br>(464.7)  | 531<br>(427.6) | 514<br>(390.5) | 388<br>(287.4) | 1048<br>(293.6) | 1043<br>(254.3) | 1027<br>(257.8) | 496<br>(176.7) |
| <b>Eosinophils*</b>           |                  |                 |                |                |                 |                 |                 |                |                 |                |                |                |                 |                 |                 |                |
| Mean no.<br>tests             | 6<br>(6.6)       | 5<br>(6.9)      | 6<br>(7.7)     | 6<br>(7.9)     | 6<br>(8.2)      | 6<br>(8.0)      | 6<br>(7.1)      | 7<br>(9.6)     | 7<br>(387.5)    | 7<br>(375.2)   | 7<br>(366.5)   | 7<br>(210.8)   | 7<br>(539.7)    | 7<br>(547.7)    | 9<br>(493.2)    | 7<br>(215.9)   |

|                          |                  |                  |                  |                   |                |                |                |                   |               |                |                |                  |               |                |                |                 |
|--------------------------|------------------|------------------|------------------|-------------------|----------------|----------------|----------------|-------------------|---------------|----------------|----------------|------------------|---------------|----------------|----------------|-----------------|
| Mean                     | 140<br>(75)      | 379<br>(54)      | 690<br>(195)     | 18918<br>(47789)  | 156<br>(75)    | 382<br>(55)    | 680<br>(181)   | 16853<br>(55480)  | 140<br>(8)    | 381<br>(8)     | 700<br>(9)     | 8167<br>(12)     | 158<br>(8)    | 383<br>(8)     | 688<br>(12)    | 3424<br>(6)     |
| Median                   | 134<br>(81)      | 369<br>(77)      | 657<br>(221)     | 15224<br>(44932)  | 151<br>(80)    | 373<br>(74)    | 650<br>(203)   | 7275<br>(34663)   | 133<br>(75)   | 370<br>(54)    | 668<br>(198)   | 5610<br>(34015)  | 153<br>(75)   | 374<br>(55)    | 656<br>(191)   | 1919<br>(3786)  |
| Max                      | 236<br>(151)     | 582<br>(249)     | 1121<br>(698)    | 40247<br>(100124) | 253<br>(151)   | 579<br>(222)   | 1083<br>(716)  | 65151<br>(250107) | 243<br>(82)   | 603<br>(80)    | 1185<br>(222)  | 19849<br>(31825) | 263<br>(80)   | 595<br>(73)    | 1136<br>(201)  | 11595<br>(1295) |
| Min                      | 68<br>(73)       | 216<br>(129)     | 375<br>(248)     | 5459<br>(25535)   | 79<br>(75)     | 222<br>(127)   | 382<br>(239)   | 955<br>(972)      | 65<br>(158)   | 202<br>(252)   | 355<br>(734)   | 4194<br>(64660)  | 77<br>(156)   | 214<br>(246)   | 348<br>(624)   | 752<br>(17611)  |
| eGFR*                    |                  |                  |                  |                   |                |                |                |                   |               |                |                |                  |               |                |                |                 |
| Mean time to progression | 618<br>(454.8)   | 575<br>(428.4)   | 552<br>(415.7)   | 560<br>(448.4)    | 477<br>(318.9) | 453<br>(301.5) | 435<br>(285.2) | 396<br>(289.8)    | 623<br>(71.1) | 547<br>(131.2) | 514<br>(245.0) | 441<br>(28943.7) | 422<br>(74.1) | 382<br>(127.9) | 386<br>(236.0) | 320<br>(959.1)  |
| Mean no. tests           | 10<br>(13.4)     | 9<br>(13.3)      | 10<br>(14.1)     | 10<br>(14.0)      | 12<br>(16.3)   | 12<br>(15.2)   | 12<br>(17.2)   | 13<br>(18.5)      | 12<br>(15.3)  | 12<br>(15.9)   | 13<br>(16.3)   | 15<br>(23.1)     | 13<br>(15.0)  | 14<br>(17.4)   | 15<br>(16.9)   | 16<br>(9.2)     |
| Mean                     | 49<br>(13.9)     | 49<br>(14.1)     | 47<br>(14.1)     | 46<br>(13.7)      | 33<br>(9.5)    | 31<br>(9.4)    | 31<br>(9.6)    | 31<br>(10.0)      | 26<br>(12.0)  | 24<br>(11.5)   | 23<br>(10.5)   | 23<br>(11.1)     | 16<br>(5.6)   | 15<br>(5.6)    | 15<br>(4.6)    | 15<br>(4.4)     |
| Median                   | 49<br>(15.2)     | 49<br>(15.1)     | 48<br>(15.1)     | 47<br>(14.5)      | 33<br>(11.0)   | 32<br>(10.6)   | 31<br>(10.5)   | 31<br>(11.4)      | 25<br>(12.3)  | 24<br>(11.5)   | 23<br>(10.9)   | 23<br>(11.3)     | 17<br>(5.8)   | 16<br>(5.9)    | 15<br>(4.9)    | 16<br>(5.6)     |
| Max                      | 66<br>(19.2)     | 63<br>(18.6)     | 62<br>(18.8)     | 61<br>(18.1)      | 50<br>(18.6)   | 47<br>(17.4)   | 46<br>(17.7)   | 48<br>(21.5)      | 44<br>(25.3)  | 37<br>(21.9)   | 35<br>(20.7)   | 36<br>(20.3)     | 28<br>(18.6)  | 24<br>(15.2)   | 24<br>(14.2)   | 23<br>(8.8)     |
| Min                      | 33<br>(17.3)     | 35<br>(16.7)     | 35<br>(16.4)     | 33<br>(15.7)      | 19<br>(9.5)    | 20<br>(8.8)    | 20<br>(8.8)    | 19<br>(10.4)      | 15<br>(9.8)   | 16<br>(9.4)    | 16<br>(8.3)    | 16<br>(10.4)     | 9<br>(4.7)    | 10<br>(4.4)    | 10<br>(3.8)    | 9<br>(3.4)      |
| Starting                 | 47<br>(14.4)     | 47<br>(13.7)     | 47<br>(13.7)     | 37<br>(13.2)      | 40<br>(12.8)   | 39<br>(12.6)   | 39<br>(12.1)   | 38<br>(12.2)      | 24<br>(10.5)  | 23<br>(9.2)    | 23<br>(8.2)    | 24<br>(7.3)      | 21<br>(8.6)   | 20<br>(7.3)    | 19<br>(6.4)    | 20<br>(5.0)     |
| Ending                   | 48<br>(22.5)     | 47<br>(21.6)     | 48<br>(22.1)     | 45<br>(13.9)      | 22<br>(11.1)   | 23<br>(9.5)    | 23<br>(10.3)   | 24<br>(15.9)      | 26<br>(20.4)  | 25<br>(19.5)   | 27<br>(20.5)   | 21<br>(4.2)      | 10<br>(7.2)   | 11<br>(5.6)    | 11<br>(5.0)    | 11<br>(6.9)     |
| Mean change              | 0.2<br>(1.3)     | 0.0<br>(0.7)     | 0.1<br>(0.8)     | 0.1<br>(0.5)      | -0.4<br>(0.7)  | -0.4<br>(0.4)  | -0.4<br>(0.3)  | 0.8<br>(7.7)      | 0.7<br>(3.9)  | 0.2<br>(1.1)   | 0.8<br>(1.4)   | 0.2<br>(0.4)     | -0.4<br>(0.7) | -0.3<br>(0.9)  | -0.4<br>(0.4)  | -0.4<br>(0.4)   |
| Laboratory*              |                  |                  |                  |                   |                |                |                |                   |               |                |                |                  |               |                |                |                 |
| PO4                      | 3.1<br>(10.7)    | 3.1<br>(0.8)     | 3.1<br>(0.9)     | 3.3<br>(0.8)      | 3.4<br>(0.9)   | 3.5<br>(0.9)   | 3.6<br>(0.9)   | 3.7<br>(0.7)      | 3.4<br>(1.0)  | 3.6<br>(0.9)   | 3.6<br>(0.9)   | 3.6<br>(0.9)     | 3.9<br>(1.0)  | 4.1<br>(0.9)   | 4.1<br>(1.0)   | 3.7<br>(0.9)    |
| HCO3                     | 25.1<br>(4.5)    | 25.0<br>(4.0)    | 24.9<br>(3.9)    | 24.3<br>(3.3)     | 24.6<br>(4.3)  | 24.6<br>(4.2)  | 24.1<br>(3.7)  | 24.9<br>(3.3)     | 24.5<br>(5.2) | 24.1<br>(4.6)  | 23.6<br>(5.1)  | 23.8<br>(3.9)    | 23.3<br>(4.9) | 23.2<br>(4.0)  | 22.4<br>(4.4)  | 24.2<br>(4.9)   |
| Uric acid                | 6.0<br>(2.5)     | 6.3<br>(2.2)     | 6.4<br>(2.3)     | 7.4<br>(2.9)      | 6.8<br>(2.4)   | 7.0<br>(2.2)   | 6.7<br>(2.0)   | 7.1<br>(1.7)      | 6.4<br>(2.7)  | 6.9<br>(2.5)   | 6.8<br>(2.6)   | 6.1<br>(2.3)     | 6.8<br>(2.3)  | 6.9<br>(2.2)   | 6.7<br>(1.9)   | 8.0<br>(3.0)    |
| HGB                      | 11.5<br>(1.9)    | 11.6<br>(1.9)    | 11.5<br>(2.0)    | 11.2<br>(2.0)     | 11.1<br>(1.8)  | 11.0<br>(1.8)  | 11.0<br>(1.8)  | 10.9<br>(1.8)     | 10.9<br>(1.9) | 10.8<br>(1.9)  | 10.5<br>(1.9)  | 10.5<br>(2.1)    | 10.4<br>(1.8) | 10.1<br>(1.6)  | 10.0<br>(1.6)  | 9.7<br>(1.5)    |
| ACR                      | 238.7<br>(767.5) | 297.3<br>(944.1) | 315.4<br>(868.9) | 183.1<br>(539.7)  | 2084.7         | 1221.1         | 1248.9         | 1168.9            | 602.8         | 774.6          | 771.0          | 940.3            | 1789.5        | 1890.0         | 2711.0         | 2741.3          |

|  |  |  |  |  |               |              |              |              |              |              |              |              |              |              |              |              |
|--|--|--|--|--|---------------|--------------|--------------|--------------|--------------|--------------|--------------|--------------|--------------|--------------|--------------|--------------|
|  |  |  |  |  | (81977.<br>3) | (3176.3<br>) | (1883.7<br>) | (1708.7<br>) | (1363.1<br>) | (1531.6<br>) | (1243.5<br>) | (1571.2<br>) | (2187.3<br>) | (1904.6<br>) | (2786.0<br>) | (2773.6<br>) |
|--|--|--|--|--|---------------|--------------|--------------|--------------|--------------|--------------|--------------|--------------|--------------|--------------|--------------|--------------|

Data are presented as number (%) unless otherwise noted.

\* Data are expressed as mean (SD).

**Figure S1. Patient Funnel**

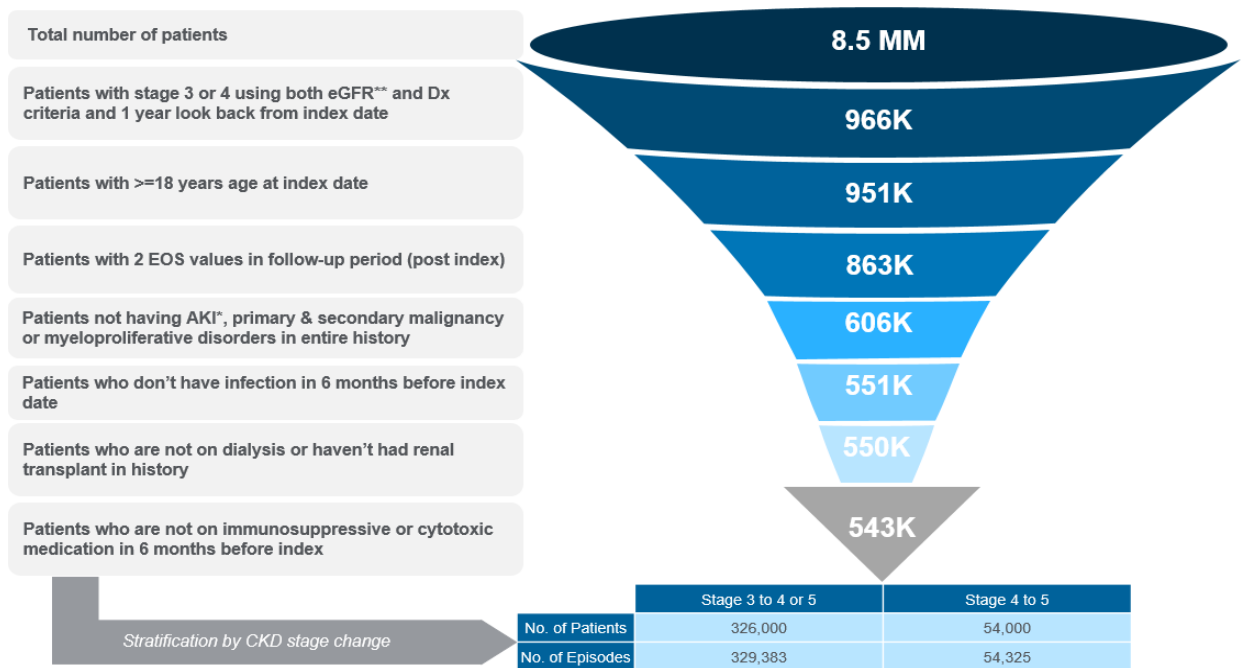

Supplement: Supplementary file 1 [file get_supplementary_file.php]
